# Supplementary material for: H 2 O 2 modulates the energetic metabolism of the cloud microbiome
Source: Copernicus journal article supplement (doi:10.5194/acp-2017-581), 2017-07-03
Supplement: Supplementary file [file acp-2017-581-AC1-supplement.pdf]

# H<sub>2</sub>O<sub>2</sub> modulates the energetic metabolism of the cloud microbiome

N. Wirgot<sup>1</sup>, V. Vinatier<sup>1</sup>, L. Deguillaume<sup>2</sup>, M. Sancelme<sup>1</sup>, and A.-M. Delort<sup>1</sup>

<sup>1</sup>Université Clermont Auvergne, CNRS, Sigma-Clermont, Institut de Chimie de Clermont-Ferrand, 63000 Clermont-Ferrand, France

<sup>2</sup>Université Clermont Auvergne, CNRS, Laboratoire de Météorologie Physique, 63000 Clermont-Ferrand, France

Correspondence to: A.-M. Delort (A-marie.delort@uca.fr)

**Abstract.** Chemical reactions in clouds lead to oxidation processes driven by radicals (mainly HO<sup>•</sup>, NO<sub>3</sub><sup>•</sup> or HO<sub>2</sub><sup>•</sup>) or strong oxidants such as H<sub>2</sub>O<sub>2</sub>, O<sub>3</sub>, nitrate and nitrite. Among those species, hydrogen peroxide plays a central role in the cloud chemistry by driving its oxidant capacity. In cloud droplets, H<sub>2</sub>O<sub>2</sub> is transformed by microorganisms which are metabolically active. Biological activity can therefore impact the cloud oxidant capacity. The present article aims at highlighting the interactions between H<sub>2</sub>O<sub>2</sub> and microorganisms within the cloud system.

First, experiments were performed with selected strains studied as reference isolated from clouds in microcosms designed to mimic the cloud chemical composition, including the presence of light and iron. Biotic and abiotic degradation rates of H<sub>2</sub>O<sub>2</sub> were measured and results showed that biodegradation was the most efficient process together with photo-Fenton process. H<sub>2</sub>O<sub>2</sub> strongly impacted the microbial energetic state as shown by adenosine triphosphate (ATP) measurements in the presence and absence of H<sub>2</sub>O<sub>2</sub>. This ATP depletion was not due to the loss of cell viability. Secondly, correlation studies were performed based on real cloud measurements from 37 clouds samples collected at the PUY station (1465 m a.s.l., France). The results support a strong correlation between ATP and H<sub>2</sub>O<sub>2</sub> concentrations and confirm that H<sub>2</sub>O<sub>2</sub> modulates the energetic metabolism of the cloud microbiome. The modulation of microbial metabolism by H<sub>2</sub>O<sub>2</sub> concentration could thus impact cloud chemistry, in particular the biotransformation rates of carbon compounds and consequently can perturb the way the cloud system is modifying the global atmospheric chemistry.

Keywords: Cloud water, Microorganisms, Hydrogen peroxide, Energetic metabolism, Atmospheric chemistry

## 1 Introduction

The atmosphere is an oxidizing medium where trace gases are transformed/removed by oxidation including methane and other organic compounds, carbon monoxide, nitrogen oxides, and sulfur gases. Evaluating the oxidizing power of the atmosphere is crucial since it controls pollutant formation and fate, aerosol production and greenhouse radiative forcing (Thompson, 1992).

In this context, hydroperoxides (ROOH) contribute to the oxidizing power of the troposphere (Lee et al., 2000; Herrmann et al., 2015) by controlling the cycling of HO<sub>x</sub> radicals (HO<sup>•</sup>, HO<sub>2</sub><sup>•</sup>). They can serve as temporary reservoirs of HO<sub>x</sub> radical since, for example, their photolysis and reactivity will regenerate HO<sup>•</sup> radicals. Among

37 hydroperoxide, hydrogen peroxide is a key gas phase atmospheric chemical species (Vione et al., 2003) with  
38 concentration in the gas phase in the ppb<sub>v</sub> level or less. The atmospheric concentration of H<sub>2</sub>O<sub>2</sub> is impacted by a  
39 variety of meteorological parameters (*e.g.* actinic flux, temperature and relative humidity) and is affected by the  
40 levels of chemical species such as VOCs, CO, O<sub>3</sub>, and NO<sub>x</sub> (Lee et al., 2000). One of the significant parameters  
41 controlling the evolution of H<sub>2</sub>O<sub>2</sub> concentration is the actinic flux intensity. Diurnal and seasonal variations of  
42 hydrogen peroxide are shown by field measurements with higher concentrations during the day and in summer  
43 than during the night and in winter. This is linked to the atmospheric formation of H<sub>2</sub>O<sub>2</sub> that results from a series  
44 of photochemical reactions creating free radicals followed by corresponding radical reactions with appropriate  
45 precursor substances.

46 In the presence of atmospheric liquid water (cloud, fog, rain), H<sub>2</sub>O<sub>2</sub> is rapidly dissolved because of its high  
47 Henry's law constant ( $7.7 \cdot 10^4$  M/atm at 298K; Sander, 2014). In this liquid phase, it is also produced by aqueous  
48 phase reactivity (Möller, 2009). Several field campaigns have reported H<sub>2</sub>O<sub>2</sub> concentrations in atmospheric water  
49 in the  $\mu$ M range (Gunz and Hoffmann, 1990; Marinoni et al., 2011; Deguillaume et al., 2014; Li et al., 2017).  
50 Hydrogen peroxide plays a central role in various important chemical processes in clouds. First, H<sub>2</sub>O<sub>2</sub> is  
51 considered as the most important oxidant for the conversion of sulfite to sulfate for pH lower than 5.5, therefore  
52 contributing significantly to the acidification of clouds and precipitations (Deguillaume et al., 2004; Shen et al.,  
53 2012). Second, the photolysis of H<sub>2</sub>O<sub>2</sub> will lead to an efficient production of the hydroxyl radical HO<sup>•</sup> (Arakaki  
54 et al., 2013) and recent study have shown that this can be a dominant aqueous source (Bianco et al., 2015). They  
55 can also directly oxidize organic compounds in the aqueous phase (Schöne and Herrmann, 2015). Finally, H<sub>2</sub>O<sub>2</sub>  
56 is involved in redox processes leading to the conversion of reactive free radicals and trace metals such as iron  
57 (Kieber et al., 2001; Deguillaume et al., 2005; Hems et al., 2017). Consequently, H<sub>2</sub>O<sub>2</sub> is a key chemical  
58 compound controlling the aqueous phase oxidant capacity and leading to the transformation of inorganic and  
59 organic compounds present in the atmospheric aqueous phase. The resulting inorganic and organic products can  
60 contribute to the aerosol phase when the cloud evaporates leading to climatic effect.

61 A few decades ago, living microorganisms have been were observed in cloud water (Sattler et al., 2001;  
62 Amato et al., 2005, 2007a,b; Wei et al., 2017). Particularly through measurements of adenosine triphosphate  
63 (ATP) and anabolic precursors or nutrient incorporation rates, it has been shown that cloud microorganisms are  
64 metabolically active and play an important role in cloud chemical reactivity (Sattler et al., 2001; Amato et al.,  
65 2007a; Hill et al., 2007; Väitilingom et al., 2012, 2013). Several studies performed on simplified or real  
66 microcosms have demonstrated that cloud microorganisms are able to degrade carbon compounds (Ariya et al.,  
67 2002; Amato et al., 2005, 2007c; Husarova et al., 2011; Väitilingom et al., 2010, 2011, 2013; Matulová et al.,  
68 2014); recent studies have also shown that this could be the case in the air (Krumins et al., 2014).

69 Microorganisms are also in direct interaction with oxidant species in clouds (iron, hydroxyl radical, hydrogen  
70 peroxide, *etc.*). Väitilingom et al. (2013) have demonstrated that microorganisms present in real cloud water are  
71 able to efficiently degrade hydrogen peroxide. This suggests that cloud microorganisms found strategies to  
72 survive and resist stresses encountered in this medium and in particular oxidative stress. In this context, Joly et  
73 al. (2015) have conducted laboratory experiments to investigate the survival of selected strains (bacteria and  
74 yeasts) isolated from cloud waters, in the presence of various concentrations of hydrogen peroxide. The results  
75 showed that the survival rates of the studied strains were not affected by H<sub>2</sub>O<sub>2</sub> exposure. In addition, the strains

76 were exposed to artificial UV-visible light mimicking the natural solar irradiation inside clouds. No significant  
77 impact on the survival of the bacterial strains was observed.

78 These results have been confirmed in real cloud water, including the **microbial community** and chemical  
79 complexity (iron, H<sub>2</sub>O<sub>2</sub>, *etc.*), incubated in a photo-bioreactor designed to mimic cloud conditions (Vaithilingom  
80 et al., 2013). Thanks to ADP/ATP ratio measurements, reflecting the energetic metabolism of microorganisms,  
81 exposed or not to solar **radiation**, it has been shown that microorganisms were not impacted by artificial light and  
82 consequently by the generation of radicals from H<sub>2</sub>O<sub>2</sub> photo-reactivity. In addition, H<sub>2</sub>O<sub>2</sub> is efficiently degraded  
83 by catalases and peroxidases involved **in oxidative** metabolism. Solar light did not modify the degradation rates  
84 of H<sub>2</sub>O<sub>2</sub>, demonstrating that the biological process was not inhibited by UV radiations and radicals.

85 Indeed solar light can indirectly impact the viability of cells by the production of reactive oxygenated species  
86 (ROS) including HO<sup>•</sup> and O<sub>2</sub><sup>•-</sup> radicals. The main sources of these radicals are H<sub>2</sub>O<sub>2</sub> photolysis or Fenton and  
87 photo-Fenton reactions involving iron (Fe) and H<sub>2</sub>O<sub>2</sub>. Most of these compounds can cross the cytoplasmic  
88 membrane by diffusion. Aerobic microorganisms can also produce similar ROS during respiration. These  
89 radicals can potentially damage **major cellular** components such as proteins, DNA and lipids and lead to cellular  
90 death. **Because** microorganisms usually are protected against these ROS, they can specifically modify their  
91 metabolism to face oxidative stress taking place in clouds. Therefore, microorganisms utilize various  
92 mechanisms involved **in oxidative** stress metabolism such as i) the production of pigments **and antioxidant**  
93 molecules (vitamins, glutathione, *etc.*) which can scavenge radicals or ii) the production of specific enzymes  
94 such as superoxide dismutase which can transform O<sub>2</sub><sup>•-</sup> into H<sub>2</sub>O<sub>2</sub>. H<sub>2</sub>O<sub>2</sub> can be dismutated or reduced  
95 respectively by catalases and other peroxidases (Delort et al., 2017).

96 The studies from Vaithilingom et al. (2013) and Joly et al. (2015) highlighted the interactions between biological  
97 activity and oxidants in clouds. In the present work, we artificially reproduced cloud conditions in microcosms to  
98 study the biotic and abiotic transformation of H<sub>2</sub>O<sub>2</sub> and, conversely, the impact of hydrogen peroxide on the  
99 metabolism of cloud microorganisms. For this purpose, we decided to study individually the effect of parameters  
100 interacting with H<sub>2</sub>O<sub>2</sub>: UV radiation, iron and bacteria. Under various experimental conditions, the degradation  
101 rates of H<sub>2</sub>O<sub>2</sub> were followed to highlight how individual parameters control its transformation. Moreover, the  
102 impact of H<sub>2</sub>O<sub>2</sub> on the energetic state of the bacterial cells was evaluated by measuring the ATP concentration  
103 over time when the cells were exposed or not to H<sub>2</sub>O<sub>2</sub>. In order to confirm our laboratory results on the  
104 interaction between microorganisms and H<sub>2</sub>O<sub>2</sub>, we performed a correlation analysis considering bio-physico-  
105 chemical parameters measured in real cloud samples collected at the PUY station. This work will lead to a better  
106 description of the mechanisms linking biological activity and cloud reactivity. **It is crucial to consider all sinks**  
107 **and sources of H<sub>2</sub>O<sub>2</sub>, especially in atmospheric chemistry models, since H<sub>2</sub>O<sub>2</sub> impacts many relevant processes**  
108 **in the atmosphere.**

## 109 **2 Material and methods**

### 110 **2.1. Description of the microcosms**

111 **Microcosms were designed to simulate as much as possible the water phase of cloud waters. They provide the**  
112 **opportunity to work under artificial solar light condition and also in the presence of microorganisms.**

113 For irradiation condition the bioreactor was equipped with lamps that emit UV-radiation (Sylvania Reptistar; 15  
114 W; 6500 K; UVA (up to 30%), UVB (up to 5%)) to mimic solar light measured directly in clouds at the PUY  
115 station (Fig. SM1). The incubation flasks were Pyrex crystallizers covered with a Pyrex filter and equipped with  
116 Teflon tubes of 8 mm Ø plugged with sterile cotton, letting air and light pass while for dark conditions they were  
117 amber Erlenmeyer flasks.

118 All incubation flasks contained 100 mL of artificial cloud solution under agitation (130 rpm). This solution was  
119 mimicking cloud chemical composition from cloud samples classified as “marine” following the work from  
120 Deguillaume et al. (2014) at the PUY station. The major part of the collected cloud samples were classified as  
121 marine (52%) supporting our choice for the artificial cloud composition.

122 For biotic conditions, the flasks were inoculated at  $10^6$  bacterial cells per mL (Vařtilingom et al., 2013). The  
123 three selected bacterial strains belonging to the Gamma-Proteobacteria (*Pseudomonas*) and Alpha-  
124 Proteobacteria classes (*Sphingomonas*) were isolated from cloud water and are representative of the genera most  
125 frequently found in cloud water samples (Vařtilingom et al., 2012) collected at the PUY site.

126 Depending on the conditions, hydrogen peroxide and iron complex (Fe-[EDDS]) were added or not to the  
127 solution in the incubators. These two compounds are present in marine cloud water collected at the PUY station  
128 at average concentrations of 7.5  $\mu\text{M}$  (with a dispersion of mean values ranging from 0.1 – 20.8  $\mu\text{M}$ ) for  $\text{H}_2\text{O}_2$   
129 and 0.5  $\mu\text{M}$  (with a dispersion of mean values ranging from BDL. – 4.9) for Fe(III) (Deguillaume et al., 2014).

130 In the cloud aqueous phase, Fe(III) may be complexed by organic compounds. Recently, it has been  
131 hypothesized that iron can be chelated by other organic ligands of biological origin (Herckes et al., 2013;  
132 Herrmann et al., 2015), and in particular by siderophores (Vinatier et al., 2016) that are ligands characterized by  
133 high complexing constants ( $K > 10^{20}$ ). Fe-[EDDS] was chosen as an iron(III) complex model because this ligand  
134 has a complexing constant for iron very close to the values for siderophores. Moreover, it is known to be stable  
135 at the working pH of 6.0 and because its chemistry has been studied in details by Li et al. (2010).

136 In addition, the working temperature was fixed at 17°C which is the average temperature of cloud samples in  
137 summer.

## 138 2.2 Bacterial strains and growth conditions

139 *Pseudomonas graminis*, 13b-3, DQ512786; *Pseudomonas syringae*, 13b-2, DQ512785, *Sphingomonas sp.*, 14b-  
140 5, DQ512789 were grown in 10 mL of R2A medium (Reasoner and Geldreich, 1985) under stirring (200 r.p.m)  
141 at 17°C for approximately 17 h, 24 h or 48 h, depending on the strain. Cells in the exponential growth phase  
142 were collected by centrifugation for 3 min at around 10000 g. The supernatant was removed and the bacterial  
143 pellet was suspended and washed twice with an artificial cloud solution (2.2). The bacterial cell concentration  
144 was estimated by optical density at 575 nm to obtain a concentration close to  $10^6$  cell  $\text{mL}^{-1}$ . Finally, the  
145 concentration of cells was precisely determined by flow cytometry analysis (BD Fascalibur Becton-Dickinson;  
146  $\lambda_{\text{exc}} = 488$  nm;  $\lambda_{\text{em}} = 530$  nm) using a method based on the addition of a fluorochrome (SYBR-green) for their  
147 counting (Marie et al., 1999).

## 148 2.3 Biodegradation assays

149 Biodegradation assays were performed in marine artificial cloud water solution that mimics real cloud conditions  
150 as described in Vařtilingom et al. (2011). Stock solutions were prepared with the following concentrations: 200

151  $\mu\text{M}$  for acetic acid ( $\text{CH}_3\text{COOH}$ ; Acros organics),  $145 \mu\text{M}$  for formic acid ( $\text{HCOOH}$ ; Fluka),  $30 \mu\text{M}$  for oxalic  
152 acid ( $\text{H}_2\text{C}_2\text{O}_4$ ; Fluka),  $15 \mu\text{M}$  for succinic acid ( $\text{H}_6\text{C}_4\text{O}_4$ ; Fluka),  $800 \mu\text{M}$  for ammonium nitrate ( $\text{H}_4\text{N}_2\text{O}_3$ ; Fluka),  
153  $100 \mu\text{M}$  for magnesium chloride hexahydrate ( $\text{MgCl}_2, 6\text{H}_2\text{O}$ ; Sigma-Aldrich),  $50 \mu\text{M}$  for potassium sulfate  
154 ( $\text{K}_2\text{SO}_4$ ; Fluka),  $400 \mu\text{M}$  for calcium chloride dihydrate ( $\text{CaCl}_2, 2\text{H}_2\text{O}$ ; Sigma-Aldrich),  $2000 \mu\text{M}$  for sodium  
155 chloride ( $\text{NaCl}$ ; Sigma-Aldrich),  $1100 \mu\text{M}$  for sodium hydroxide ( $\text{NaOH}$ ; Merck),  $315 \mu\text{M}$  for sulfuric acid  
156 ( $\text{H}_2\text{SO}_4$ ; Sigma-Aldrich). Finally, the obtained solution was adjusted to pH 6 as necessary with a few drops of  
157 the solutions of  $\text{NaOH}$  or  $\text{H}_2\text{SO}_4$  used for the preparation of the marine artificial cloud water solution and  
158 sterilized by filtration (Polyethersulfone membrane,  $0.20 \mu\text{m}$ ; Fisher Scientific) before use. The artificial cloud  
159 water solution was ten times more concentrated than a real cloud water solution in order to stabilize the pH. This  
160 was also the case for bacteria concentration because the bacteria/substrate ratio should be kept identical to that of  
161 real cloud. Indeed, it has been demonstrated that if this ratio is maintained, the degradation rate remains constant  
162 (Vaïtilingom et al., 2010).

163 The equipment was sterilized by autoclaving at  $121^\circ\text{C}$  for 20 minutes and all manipulations were performed  
164 under sterile conditions. Biodegradation assays were performed in marine artificial cloud solutions inoculated  
165 with bacterial cells and incubated in a bioreactor (Infors HT Multitron II) at  $17^\circ\text{C}$  in the presence or absence of  
166 hydrogen peroxide solution, of iron complex solution and under irradiation or obscurity condition. At regular  
167 intervals, samples were taken and stored at  $-20^\circ\text{C}$ .

168 Hydrogen peroxide solution was prepared from a commercial solution ( $\text{H}_2\text{O}_2$ , 30%; not stabilized Fluka  
169 Analytical). 1:1 stoichiometry iron complex solution was prepared from iron (III) chloride hexahydrate ( $\text{FeCl}_3$ ,  
170  $6\text{H}_2\text{O}$ ; Sigma-Aldrich) and from (S,S)- ethylenediamine- $\text{N,N}'$ -disuccinic acid trisodium salt (EDDS, 35% in  
171 water). The hydrogen peroxide solution and the iron complex solution were freshly prepared before each  
172 experiment and the final working concentrations were fixed at  $20 \mu\text{M}$  and  $4 \mu\text{M}$  respectively, in agreement with  
173 the real concentrations detected in samples collected at the PUY station multiplied by a factor ten when median  
174 values measured in marine cloud waters are considered (Deguillaume et al., 2014).

## 175 2.4 Analyses

176 Hydrogen peroxide was quantified with a miniaturised Lazrus fluorimetric assay (Lazrus et al., 1985;  
177 Vaïtilingom et al., 2013). This method is based on a reaction between hydrogen peroxide, Horse Radish  
178 Peroxidase (HRP) and 4-hydroxyphenylacetic acid that produces a fluorescent dimeric compound. Fluorescence  
179 readings (Safire II TECAN<sup>®</sup>;  $\lambda_{\text{exc}} = 320 \text{ nm}$ ,  $\lambda_{\text{em}} = 390 \text{ nm}$ ) were made in a 96 well plate format.

180 Bioluminescence was used to analyse adenosine triphosphate (ATP) concentrations (Glomax<sup>®</sup> 20/20 single tube  
181 luminometer from Promega). This technique is based on an enzymatic reaction involving luciferin and  
182 luciferase. The protocol used was adapted from Biothema<sup>®</sup> commercial kit instructions (Koutny et al., 2006).

183 In order to determine the survival rate of microorganisms in the presence of hydrogen peroxide ( $20 \mu\text{M}$ ), plate-  
184 counts were performed on R2A agar medium at the beginning of each experiment and after 3, 7 and 24 hours of  
185 incubation. Plates were incubated 3 days at  $17^\circ\text{C}$  before CFU counts.

## 186 2.5 Determination of the initial degradation rates of hydrogen peroxide

187 The processing of data was done with the Origin 6.1 software.

188 The graphs representing the hydrogen peroxide concentration decrease as a function of time were plotted. The  
189 degradation rates have been calculated from the initial slopes (the first five time points i.e. between 0 and 2  
190 hours) normalized with the concentrations of cells. During these two hours no cell growth was observed.  
191

## 192 2.6 Cloud sampling and statistical analysis

193 Cloud water sampling was performed on the summit of the PUY station (summit of the puy de Dôme, 1465 m  
194 a.s.l., France) which is part of the atmospheric survey networks EMEP, GAW, and ACTRIS. The detachable part  
195 of the impactor was sterilized beforehand by autoclave at 121°C for 20 min and the fixed part was rinsed with  
196 alcohol at 70° and then with sterile water just before sampling.

197 Between 2004 and 2013, 89 cloud events were collected at the PUY station. The origin of these clouds can be  
198 analyzed according to their back trajectories in four sectors (North/West, South/West, West and North/East).  
199 They can be also considered in four different categories considering their chemical composition (marine,  
200 continental, highly marine and polluted) as described in Deguillaume et al. (2014).

201 Various parameters were measured including ATP, bacteria and fungi concentration, inorganic and organic  
202 species concentration ( $\text{H}_2\text{O}_2$ ,  $\text{SO}_4^{2-}$ ,  $\text{NO}_3^-$ ,  $\text{Cl}^-$ , acetate, formate, oxalate,  $\text{Na}^+$ ,  $\text{NH}_4^+$ ,  $\text{Mg}^{2+}$ ,  $\text{K}^+$ ,  $\text{Ca}^{2+}$ ), temperature  
203 and pH (see Table SM1 for details). More information about the cloud sample collection is given in Deguillaume  
204 et al. (2014).

205 These data were used in this study to achieve statistical analyses. R software 3.1.2 was used to carry out  
206 principal component analysis (PCA). The data of 37 cloud events (of 89 total) were selected after the constraints  
207 related to this statistical analysis (e.g. the cloud events with more than 10 percent of missing values (parameters)  
208 were not considered) were applied.

209 In addition, statistical significance test was evaluated using PAST software (Hammer et al., 2001). Mean  
210 difference was considered to be statistically significant for a p-value less than 0.05.

## 211 3 Results

212 The interactions between  $\text{H}_2\text{O}_2$ , which is one of the major oxidant present in clouds, and microorganisms were  
213 investigated by performing experiments in artificial cloud microcosms but also by considering chemical and  
214 biological parameters measured in real cloud samples over long period at the PUY station.

### 215 3.1 Experiments in artificial cloud water microcosms

216 Experiments were conducted in microcosms mimicking cloud conditions in which each important parameters  
217 including  $\text{H}_2\text{O}_2$ , iron, light and the presence of bacteria could be studied individually or in complementarity.

#### 218 Hydrogen peroxide degradation in artificial cloud water

219  $\text{H}_2\text{O}_2$  degradation was monitored periodically over a 8 h period. The kinetic profiles were similar for the three  
220 strains. Results obtained with *Pseudomonas graminis* (13b-3) are illustrated in Figure 1 whereas the results  
221 obtained with the other strains are presented for information in Figure SM2.

222 Under abiotic condition, the degradation of hydrogen peroxide is clearly effective in the presence of artificial  
223 solar light and Fe-[EDDS] complex, due to the photo-Fenton reaction, with an initial degradation rate of  $1.07 \cdot 10^7$



224  $^9 \text{ mol L}^{-1} \text{ s}^{-1}$  (Table 1(a)). After 150 min this degradation rate decreases in parallel with EDDS by oxidation  
225 occurs (Li et al., 2010). In the presence of the Fe-[EDDS] complex alone and in the absence of light, hydrogen  
226 peroxide is almost not degraded. Indeed, the degradation rate of  $\text{H}_2\text{O}_2$  due to the Fenton reaction is much lower  
227 ( $2.23 \cdot 10^{-10} \text{ mol L}^{-1} \text{ s}^{-1}$ ) than the value obtained with the photo-Fenton reaction. Exposing the microcosm only to  
228 our light conditions, the photolysis reaction of  $\text{H}_2\text{O}_2$  is extremely slow ( $1.38 \cdot 10^{-10} \text{ mol L}^{-1} \text{ s}^{-1}$ ) due to the low  
229 absorption of  $\text{H}_2\text{O}_2$  in the solar spectrum measured inside a cloud and that was reproduced by the lamps used for  
230 these experiments (Fig. SM1).

231 **For the biotic conditions, the initial biodegradation rates are summarized in Table 1(b).** These results show that,  
232 under our experimental conditions, hydrogen peroxide was degraded more efficiently in the presence of bacteria  
233 even if the values obtained stay **within** the same order of magnitude compared to the abiotic conditions with  
234 artificial light and Fe-[EDDS] complex. *Pseudomonas graminis* (13b-3) and *Pseudomonas syringae* (13b-2) are  
235 the most active strains followed by *Sphingomonas sp* (14b-5). For each strain, biodegradation rates are **within the**  
236 same order of magnitude without wide variations depending on the tested conditions, *i.e.* in the presence or  
237 absence of artificial light and of Fe-[EDDS] complex.

238 **The selected strains** all degrade  $\text{H}_2\text{O}_2$  **within the same** order of magnitude (average value for the three strains and  
239 for the condition with iron and light  $1.76 \cdot 10^{-9} \text{ mol L}^{-1} \text{ s}^{-1}$  and with iron without light  $1.40 \cdot 10^{-9} \text{ mol L}^{-1} \text{ s}^{-1}$ ). In  
240 Vaitilingom et al. (2013), the biodegradation rates of  $\text{H}_2\text{O}_2$  **were found within the same order of magnitude**  
241 (average value for two distinct clouds with light  $0.98 \cdot 10^{-9} \text{ mol.L}^{-1} \text{ s}^{-1}$  and without light  $0.29 \cdot 10^{-9} \text{ mol L}^{-1} \text{ s}^{-1}$ ). The  
242 results obtained are **within** the same order of magnitude **of** values in real cloud environment thereby **validating**  
243 **our microcosm conditions.** **This demonstrates that under our experimental conditions, the selected strains**  
244 **degrade  $\text{H}_2\text{O}_2$  like the microbiome of real clouds.** In addition it validates our approach to separately analyse the  
245 **influence of each parameter (Fe,  $\text{H}_2\text{O}_2$ , light,...) on the microbial energetic state metabolism in artificial marine**  
246 **cloud solution detailed in the next section.**

#### 247 **Impact of the $\text{H}_2\text{O}_2$ on the microbial energetic state in artificial marine cloud solution**

248 The impact of the presence of  $\text{H}_2\text{O}_2$  on the energetic state of the bacterial cells was evaluated by measuring the  
249 time evolution of ATP concentration for the three strains (Fig. 2). The ATP concentration was measured in the  
250 presence (Fig. 2a, b, c - black square) or absence (Fig. 2a, b, c - white square) of  $\text{H}_2\text{O}_2$ . In the absence of  $\text{H}_2\text{O}_2$ , a  
251 strong increase of ATP concentration was observed reflecting an active metabolism of the bacteria. On the  
252 contrary, in the presence of  $\text{H}_2\text{O}_2$ , the results were clearly different and can be described in two phases. In the  
253 first phase, ATP concentration was decreasing while in a second phase it was progressively increasing  
254 (*Pseudomonas graminis*, 13b-3) or stabilizing (*Pseudomonas syringae*, 13b-2, *Sphingomonas sp.*, 14b-5). The  
255 kinetics of ATP concentration evolution and  $\text{H}_2\text{O}_2$  degradation are closely related. As discussed earlier (Fig. 1),  
256 the  $\text{H}_2\text{O}_2$  initially present ( $20 \mu\text{M}$ ) was entirely degraded in approximately 3 h (depending on **the strain**); this  
257 corresponds exactly to the end of the ATP decrease. **Complementary experiments were performed with**  
258 **incubations of the cells in the presence or absence of light and/or iron complex (Fe-[EDDS]) under conditions**  
259 **similar to that described previously in the presence of  $\text{H}_2\text{O}_2$  alone.** The results obtained for the three strains are  
260 reported in Figure SM3 (*Pseudomonas graminis*), Figure SM4 (*Pseudomonas syringae*) and Figure SM5  
261 (*Sphingomonas sp.*).

262 The results show that light and iron complex have no impact on the ATP concentration decrease. The measured  
263 ATP concentration in the presence or absence of artificial light and/or iron(III) complex is similar to that  
264 observed in the presence of H<sub>2</sub>O<sub>2</sub> alone. The ATP concentration is thus only linked to the presence of H<sub>2</sub>O<sub>2</sub>.

### 265 **Impact of H<sub>2</sub>O<sub>2</sub> on the survival of the microbial strains**

266 We also controlled that the decrease of ATP in the presence of H<sub>2</sub>O<sub>2</sub> was not due to cell mortality. **Results of the**  
267 **number of culturable bacteria in the presence or absence H<sub>2</sub>O<sub>2</sub> are shown in Figure 3.** The evolution of the cell  
268 concentration was not significantly different when cells were incubated in the presence or absence of hydrogen  
269 peroxide. The decrease of ATP is therefore not linked to a lower concentration of cells but to a modification of  
270 metabolic pathways due to H<sub>2</sub>O<sub>2</sub> presence. The total number of cells **increased** by a factor 5 to 10 after 24h  
271 showing that bacteria were also able to divide and grow.

### 272 **3.2 Impact of H<sub>2</sub>O<sub>2</sub> on the microbial energetic metabolism in real cloud environment**

273 In the previous section, we showed that H<sub>2</sub>O<sub>2</sub> had a strong impact on the energetic metabolism of cells under our  
274 microcosm conditions. To go further, we looked at the potential impact of H<sub>2</sub>O<sub>2</sub> on microbial energetic states in  
275 real cloud samples by carrying out statistical analyses based on data measured on real cloud water collected at  
276 the PUY station.

277 For this, principal component analysis (PCA) was used. In order to perform this multivariate statistical analysis,  
278 Table SM1 was built.

279 The result of the PCA analysis is presented in Figure 4. The first two dimensions contain practically 50% of the  
280 total inertia (total variance of the data table) reflecting the validity and reliability of the result. The PCA shows  
281 that if we consider all important parameters in the collected cloud samples a strong correlation appears between  
282 ATP and H<sub>2</sub>O<sub>2</sub> concentrations (longer vectors and very close on the PCA). There is no correlation between ATP  
283 concentration and the number of bacteria (vectors practically orthogonal); this shows that H<sub>2</sub>O<sub>2</sub> is linked to the  
284 energetic state of the cells and not to their concentration. Also, there is no correlation between ATP and markers  
285 of pollution such as the pH values, the NO<sub>3</sub><sup>-</sup>, SO<sub>4</sub><sup>2-</sup> and NH<sub>4</sub><sup>+</sup> concentrations or even the temperature that could  
286 impact microbial metabolism.

287 In addition, Spearman rank correlation test (non-parametric test) was performed based on the 37 cloud samples  
288 to confirm the correlation between H<sub>2</sub>O<sub>2</sub> and ATP. The values used for this test are presented in Table SM1. A p-  
289 value of 0.0047 was obtained with a Spearman's coefficient of 0.45 (Zar, 1972). This shows an extremely strong  
290 correlation between H<sub>2</sub>O<sub>2</sub> and **ATP, as** theoretically the Spearman's coefficient must be greater than 0.27 for 37  
291 observations and the p-value **less than** 0.05 (significance threshold). To confirm that, ATP depletion due to H<sub>2</sub>O<sub>2</sub>  
292 impact was not linked with the mortality of cells, a Spearman rank correlation test was also performed to  
293 evaluate the correlation between ATP and total microorganisms concentrations (sum of bacteria and fungi  
294 concentrations in Table SM1) (p-value superior to 0.37).

295 Figure 4 suggested that ATP or H<sub>2</sub>O<sub>2</sub> could be also correlated to formate and oxalate **since** the vectors were  
296 relatively close. A Spearman rank correlation test (non-parametric test) was thus performed based on data  
297 extracted from the 37 cloud samples (Table SM1). A strong correlation was obtained between ATP and formate  
298 (p-value=0.0043, Spearman's coefficient = 0.46), and between H<sub>2</sub>O<sub>2</sub> and formate (p-value = 0.00015,  
299 Spearman's coefficient= 0.58). ATP-oxalate correlation is rather weak (p-value = 0.030, Spearman's



300 coefficient= 0.36) and much lower than the ATP-H<sub>2</sub>O<sub>2</sub> correlation, similar values were obtained for oxalate and  
301 H<sub>2</sub>O<sub>2</sub> (p-value = 0.035, Spearman's coefficient = 0.35).

#### 302 4 Discussion

303 Our objective was to study in detail the interactions between cloud microorganisms and H<sub>2</sub>O<sub>2</sub>.  
304 First we looked at the mechanisms involved in H<sub>2</sub>O<sub>2</sub> transformations under laboratory conditions by isolating  
305 each parameter to determine its impact on H<sub>2</sub>O<sub>2</sub> (artificial light, Fe-[EDDS] complex and bacteria). Degradation  
306 rates of hydrogen peroxide were precisely determined for different microbial strains frequently found in cloud  
307 water samples collected at the PUY site. The results show that all bacterial strains studied under these conditions  
308 degrade H<sub>2</sub>O<sub>2</sub> within the same order of magnitude as abiotic conditions. The degradation rates of H<sub>2</sub>O<sub>2</sub> by  
309 bacteria are not impacted by the presence of light and Fe-[EDDS] and consequently by the generation of HO•  
310 radicals. On the opposite, in these laboratory experiments mimicking real cloud conditions, we have shown that  
311 H<sub>2</sub>O<sub>2</sub> has a strong impact on the microbial energetic state of the cells. This strong decrease of ATP concentration  
312 is not linked to the number of cells as bacteria are able to divide and grow in the presence of H<sub>2</sub>O<sub>2</sub>. This reveals  
313 that microorganisms are able to manage the stress induced by H<sub>2</sub>O<sub>2</sub> through their metabolism. It is likely that  
314 they could respond using enzymes involved in H<sub>2</sub>O<sub>2</sub> degradation (e.g. catalases, peroxidases, etc.) and other  
315 typical antioxidant molecules (glutathione, etc.).

316 A few studies reported the decrease of ATP concentration in microorganisms (Perricone et al., 2003), plants  
317 (Tiwari et al., 2002) or mammalian cells (Spragg et al., 1985; Josephson et al., 1991; Sporn and Peters-  
318 Goldenwhen, 1988, Hyslop et al., 1988; Oka et al., 2012) exposed to H<sub>2</sub>O<sub>2</sub>. Fig. 5 illustrates how H<sub>2</sub>O<sub>2</sub> could  
319 affect the concentration of ATP in the cells. First H<sub>2</sub>O<sub>2</sub> could directly inhibit the ATP synthase, a membrane  
320 protein synthesizing ATP from ADP (Tamarit et al 1998). Second H<sub>2</sub>O<sub>2</sub> could impact different metabolic  
321 pathways which are interconnected including glutathione metabolism, glycolysis, TCA cycle and DNA repair  
322 system. The functioning of the enzymes in these pathways and also the activity of the ATP synthase are  
323 dependent on the redox potential of the cells (NAD<sup>+</sup>/NADH, NADP<sup>+</sup>/NADPH ratios), and as a consequence the  
324 ATP concentration is regulated by this redox potential (Haddock and Jones, 1977, Singh et al., 2007, Oka et al.,  
325 2012). If for instance NAD<sup>+</sup> is depleted when the repair system is activated to avoid potential DNA damages  
326 induced by H<sub>2</sub>O<sub>2</sub>, then ATP is depleted, and finally all the metabolic pathways involving these compounds are  
327 impacted and a complete change in the metabolome can be expected.

328 We have shown, thanks to statistical analyses, that there was also a high correlation between H<sub>2</sub>O<sub>2</sub> and ATP  
329 concentrations in real cloud samples collected under various environmental conditions. We suggest thus that  
330 hydrogen peroxide modulates the global metabolism of cloud microorganisms.

331 Another interesting correlation was obtained between H<sub>2</sub>O<sub>2</sub> and formate as well as ATP with formate. This could  
332 result from different concomitant processes. First formate is the most oxidized carbon molecule before CO<sub>2</sub>  
333 generated from successive oxidations of the organic matter by radicals issued from H<sub>2</sub>O<sub>2</sub>. Second it could reveal  
334 the impact of H<sub>2</sub>O<sub>2</sub> on the C1 metabolism; it is known that C1 compounds can be transformed by cloud  
335 microorganisms (Husàrovà et al., 2011, Vaitilingom et al., 2010, 2011, 2013). In addition Thomas et al. (2016)  
336 report the overproduction of formate in a strain of *Pseudomonas fluorescens* exposed to H<sub>2</sub>O<sub>2</sub>. Indeed formate  
337 contributes to the anti-oxidant strategy of this bacterium to supply NADH which is known to be decreased under  
338 oxidative conditions, -formate helps thus to control the cellular redox potential (see Fig. 5)

339 Finally, this work brings new insights into the interactions between H<sub>2</sub>O<sub>2</sub> and the cloud microbiome and its  
340 potential consequences on cloud chemistry (see Fig. 6).

341 First it confirms that cloud microorganisms are able to efficiently degrade hydrogen peroxide and potentially  
342 impact the global carbon budget and the oxidant capacity of clouds as already shown in Vaitilingom et al.  
343 (2013). By decreasing H<sub>2</sub>O<sub>2</sub> concentration, radical chemistry is less efficient to degrade the organic matter.  
344 Second we show here for the first time that H<sub>2</sub>O<sub>2</sub> impacts the energetic metabolism of the cloud microbiome and  
345 thus potentially modulates its carbon metabolism. As a consequence it can modify the final transformation of the  
346 organic matter in clouds. This reciprocal interaction between H<sub>2</sub>O<sub>2</sub> and microorganisms and its subsequent  
347 impact on cloud chemistry is clearly dependent on H<sub>2</sub>O<sub>2</sub> concentration.

348 To go further in the understanding of the modulation of the metabolic pathways (including carbon, nitrogen,  
349 amino-acids or sugars) induced by H<sub>2</sub>O<sub>2</sub>, a combined metabolomic and transcriptomic approach could be used.

350 The next step could be to integrate biological data in numerical atmospheric models to better quantify  
351 consequence of this modulation on atmospheric chemistry.

352 *Acknowledgments.* N. Wirgot is a recipient of a PhD fellowship from the MESR (French government).

353 Part of this work was supported by the French ANR program BIOCAP (ANR-13-BS06-0004). The authors are  
354 very grateful to the OPGC/LaMP staff for collecting the cloud samples at the PUY station, see the database of  
355 cloud biological and chemical composition [wwobs.univ-bpclermont.fr/SO/beam/index.php](http://wwobs.univ-bpclermont.fr/SO/beam/index.php).

## 356 **References**

357 Amato, P., Ménager, M., Sancelme, M., Laj, P., Mailhot, G., Delort, A.-M.: Microbial population in cloud water  
358 at the Puy de Dôme: implications for the chemistry of clouds, *Atmos. Environ.*, 39, 4143-4153,  
359 doi :10.1016/j.atmosenv.2005.04.002, 2005.

360 Amato, P., Parazols, M., Sancelme, M., Mailhot, G., Laj, P., Delort, A. M.: An important oceanic source of  
361 micro-organisms for cloud water at the Puy de Dôme (France), *Atmos. Environ.*, 41, 8253-8263,  
362 doi:10.1016/j.atmosenv.2007.06.022, 2007a.

363 Amato, P., Parazols, M., Sancelme, M., Laj, P., Mailhot, G., Delort, A. M.: Microorganisms isolated from the  
364 water phase of tropospheric clouds at the Puy de Dôme: major groups and growth abilities at low  
365 temperatures, *FEMS Microbiol. Ecol.*, 59, 242-254, doi:10.1111/j.1574-6941.2006.00199, 2007b.

366 Amato, P., Demeer, F., Melaouhi, A., Fontanella, S., Martin-Biesse, A.-S., Sancelme, M., Delort, A.-M.: A fate  
367 for organic acids, formaldehyde and methanol in cloud water: their biotransformation by micro-organisms,  
368 *Atmos. Chem. Phys.*, 7, 5253-5276, doi:10.5194/acp-7-4159-2007, 2007c.

369 Arakaki, T.; Anastasio, C.; Kuroki, Y.; Nakajima, H.; Okada, K.; Kotani, Y.; Handa, D.; Azechi, S.; Kimura, T.;  
370 Tshako, A. A general scavenging rate constant for reaction of hydroxyl radical with organic carbon in  
371 atmospheric waters. *Environ. Sci. Technol.* 2013 , 47 (15), 8196-8203.

372 Ariya, P. A., Nepotchatykh, O., Ignatova, O., Amyot, M.: Microbiological degradation of atmospheric organic  
373 compounds, *Geophys. Res. Lett.*, 29, 34.1-34.4, doi:10.1029/2002GL015637, 2002.

374 Bianco, A., Passananti, M., Perroux, H., Voyard, G., Mouchel-Vallon, C., Chaumerliac, N., Mailhot, G.,  
375 Deguillaume, L., Brigante, M.: A better understanding of hydroxyl radical photochemical sources in cloud  
376 waters collected at the puy de Dôme station - experimental versus modelled formation rates, *Atmos. Chem.*  
377 *Phys.*, 15, 9191-9202, doi:10.5194/acp-15-9191-2015, 2015.

378 Deguillaume, L., Leriche, M., Desboeufs, K., Mailhot, G., George, C., Chaumerliac, N.: Transition metals in  
379 atmospheric liquid phases: sources, reactivity, and sensitive parameters, *Chem. Rev.*, 105, 9, 3388-3431,  
380 doi:10.1021/cr040649c, 2005.

381 Deguillaume, L., Charbouillot, T., Joly, M., Vaïtilingom, M., Parazols, M., Marinoni, A., Amato, P., Delort, A-  
382 M., Vinatier, V., Flossmann, A., Chaumerliac, N., Pichon, J-M., Houdier, S., Laj, P., Sellegri, K., Colomb,  
383 A., Brigante, M., Mailhot, G.: Classification of clouds sampled at the puy de Dôme (France) based on 10 yr  
384 of monitoring of their physicochemical properties, *Atmos. Chem. Phys.*, 14, 1485-1506, doi:10.5194/acp-14-  
385 1485-2014, 2014.

386 Delort, A.-M., Vaïtilingom, M., Joly, M., Amato, P., Wirgot, N., Lallement, A., Sancelme, M., Matulova, M.,  
387 Deguillaume, L.: Clouds: a transient and stressing habitat for microorganisms, in *Microbial Ecology of*  
388 *Extreme Environments*, Ed. Chénard, C. and Lauro, F.M., Springer, Chapter 10, doi: 10.1007/978-3-319-  
389 51686-8\_10, 2017.

390 Gunz, D. W., and Hoffmann, M. R.: Atmospheric chemistry of peroxides: a review, *Atmos. Environ. Part A.*  
391 *General Topics*, 24, 1601-1633, doi:10.1016/0960-1686(90)90496-A, 1990.

392 Haddock, B.A., and Jones, C.W.: Bacterial respiration, *Bacteriol. Rev.*, 41, 47-99, 1977.

393 Hammer, Ø., Harper, D.A.T, Ryan, P.D.: PAST: palaeontological statistics software package for education and  
394 data analysis, *Palaeontol. Electron.*, 4, 178, 2001.

395 Herrmann H, Schaefer T, Tilgner A, Styler SA, Weller C, Teich M, et al.: Tropospheric aqueous-phase  
396 chemistry: kinetics, mechanisms, and its coupling to a changing gas phase. *Chem. Rev.* 115, 4259–334, doi:  
397 10.1021/cr500447k, 2015.

398 Hems, R.F.; Hsieh, J.S.; Slodki, M.A.; Shouming, Z. ; Abbatt, J.P.D. Suppression of OH Generation from the  
399 Photo-Fenton Reaction in the Presence of  $\alpha$ -Pinene Secondary Organic Aerosol Material. *Environ. Sci.*  
400 *Technol. Lett.* DOI:10.1021/acs.estlett.7b00381

401 Hill, K. A., Shepson, P. B., Galbavy, E. S., Anastasio, C., Kourtev, P. S., Konopka, A., Stirm, B. H.: Processing  
402 of atmospheric nitrogen by clouds above a forest environment, *J. Geophys. Res.*, 112, doi:  
403 10.1029/2006JD008002, 2007.

404 Husárová, S., Vaïtilingom, M., Deguillaume, L., Traikia, M., Vinatier, V., Sancelme, M., Amato, P., Matulová,  
405 M., Delort, A.-M.: Biotransformation of methanol and formaldehyde by bacteria isolated from clouds.  
406 Comparison with radical chemistry, *Atmos. Environ.*, 45, 6093-6102, doi:10.1016/j.atmosenv.2011.06.035,  
407 2011.

408 Hyslop, P.A., Hinshawz, D.B., Halsey, W.A., Schraufstatter, I.U., Sauerhebery, R.D., Roger G. Spraggj, R.G.,  
409 Jackson, J.H., Cochrane, C.G.: Mechanisms of oxidant-mediated cell injury the glycolytic and mitochondrial

410 pathways of ADP phosphorylation are major intracellular targets inactivated by hydrogen peroxide, *J. Biol.*  
411 *Chem.*, 263, 1665-1675, 1988.

412 Joly, M., Amato, P., Sancelme, M., Vinatier, V., Abrantes, M., Deguillaume, L., Delort, A.-M.: Survival of  
413 microbial isolates from clouds toward simulated atmospheric stress factors, *Atmos. Environ.*, doi:  
414 10.1016/j.atmosenv.2015.07.009, 2015.

415 Josephson, R.A., Silverman, H.S., Lakatta, E.G., Stern, M.D., Zweier, J.L.: Study of the mechanisms of  
416 hydrogen peroxide and hydroxyl free radical-induced cellular injury and calcium overload in cardiac  
417 myocytes, *J. Biol. Chem.*, 266, 2354-2361, 1991.

418 Kieber, R.J., Peake, B., Willey, J.D., Jacobs, B.: Iron speciation and hydrogen peroxide concentrations in New  
419 Zealand rainwater, *Atmos. Environ.*, 35, 6041-6048, doi:10.1016/S1352-2310(01)00199-6, 2001.

420 Kok, G.L.: Measurements of hydrogen peroxide in rainwater, *Atmos. Environ.*, 14, 653-656, doi:10.1016/0004-  
421 6981(80)90048-7, 1980.

422 Koutny, M., Sancelme, M., Dabin, C., Pichon, N., Delort, A.-M., Lemaire, J.: Acquired biodegradability of  
423 polyethylenes containing pro-oxidant additives, *Polym. Degrad. Stabil.*, 91, 1495-1503,  
424 doi:10.1016/j.polymdegradstab.2005.10.007, 2006.

425 Kroll, J. H., and Seinfeld, J. H.: Chemistry of secondary organic aerosol: formation and evolution of low-  
426 volatility organics in the atmosphere, *Atmos. Environ.*, 42, 3593-3624, doi:10.1016/j.atmosenv.2008.01.003,  
427 2008.

428 **Krumins, V., Mainelis G., Kerkhof, L.J., and Fennell, D.E.: Substrate-dependent rRNA production in an airborne**  
429 **bacterium. *Environ. Sci. Technol. Lett.*, 9, 376-381, 2014.**

430 Lazrus, A. L., Kok, G. L., Gitlin, S. N., Lind, J. A., McLaren, S. E.: Automated fluorimetric method for  
431 hydrogen peroxide in atmospheric precipitation, *Anal. Chem.*, 57, 917-922, doi:10.1021/ac00281a031, 1985.

432 Lee, M., Heikes, B.G., O'Sullivan, D.W.: Hydrogen peroxide and organic hydroperoxide in the troposphere: a  
433 review, *Atmos. Environ.*, 34, 3475-3494, doi:10.1016/S1352-2310(99)00432-X, 2000.

434 Li, J., Mailhot, G., Wu, F., Deng, N.: Photochemical efficiency of Fe(III)-EDDS complex: OH radical  
435 production and 17 $\beta$ -estradiol degradation, *J. Photoch. Photobio. A.*, 212, 1-7,  
436 doi:10.1016/j.jphotochem.2010.03.001, 2010.

437 **Li, J., Wang, X., Chen, J., Zhu, C., Li, W., Li, C., Liu, L., Xu, C., Wen, L., Xue, L., Wang, W., Ding, A. and**  
438 **Herrmann, H.: Chemical composition and droplet size distribution of cloud at the summit of Mount Tai,**  
439 **China, *Atmospheric Chem. Phys. Discuss.*, 1-21, doi:10.5194/acp-2016-1175, 2017.**

440 **Marie, D., Brussaard, C.P.D., Partensky, F., Vaulot, D. : Flow cytometric analysis of phytoplankton, bacteria and**  
441 **viruses, Robinson, J.P., Ed. *Curr. Protoc. Cytom.*, John Wiley & Sons, 11.11, 1-15, 1999.**

442 Marinoni, A., Parazols, M., Brigante, M., Deguillaume, L., Amato, P., Delort, A.-M., Laj, P., Mailhot, G.:  
443 Hydrogen peroxide in natural cloud water: sources and photoreactivity, *Atmos. Res.*, 101, 1-2, 256-263,  
444 doi :10.1016/j.atmosres.2011.02.013, 2011.

445 Matulová, M., Husárová, S., Capek, P., Sancelme, M., Delort, A. M.: Biotransformation of various saccharides

446 and production of exopolymeric substances by cloud-borne *Bacillus sp.* 3B6, Environ. Sci. Technol., 48,  
447 14238-14247, doi:10.1021/es501350s, 2014.

448 Möller, D.: Atmospheric hydrogen peroxide: evidence for aqueous-phase formation from a historic perspective  
449 and one-year measurement campaign, Atmos. Chem. Phys., 43, 5923-5936,  
450 doi:10.1016/j.atmosenv.2009.08.013, 2009.

451 Oka, S.I., Hsu, C.P., Sadoshima, J.: Regulation of cell survival and death by pyridine nucleotides., Circ. Res.,  
452 111, 611-627, doi:10.1161/CIRCRESAHA.111.247932, 2012.

453 Perricone, C.D., Park, S., Imlay, J.A., Weiser, J.N.: Factors contributing to hydrogen peroxide resistance in  
454 *Streptococcus pneumoniae* include pyruvate oxidase (SpxB) and avoidance of the toxic effects of the Fenton  
455 reaction, J. Bacteriol., 185, 6815-6825, doi:10.1128/JB.185.23.6815-6825.2003, 2003.

456 Pruppacher, H. R., and Jaenicke, R.: The processing of water vapor and aerosols by atmospheric clouds, a global  
457 estimate, Atmos. Res, 38, 283-295, doi:10.1016/0169-8095(94)00098-X, 1995.

458 Ravishankara, A.R.: Heterogeneous and multiphase chemistry in the troposphere, Science, 276, 1058-1065,  
459 doi:10.1126/science.276.5315.1058, 1997.

460 Reasoner, D.J., Geldreich, E.E.: A new medium for the enumeration and subculture of bacteria from potable  
461 water, Appl. Environ. Microb., 49, 1-7, 1985.

462 Sander, R.: Compilation of Henry's law constants (version 4.0) for water as solvent, Atmos. Chem. Phys., 15,  
463 4399-4981, doi:10.5194/acp-15-4399-2015, 2015.

464 Sattler, B., Puxbaum, H., Psenner, R.: Bacterial growth in supercooled cloud droplets, Geophys. Res. Lett., 28,  
465 239-242, doi :10.1029/2000GL011684, 2001.

466 Schöne, L. and Herrmann, H.: Kinetic measurements of the reactivity of hydrogen peroxide and ozone towards  
467 small atmospherically relevant aldehydes, ketones and organic acids in aqueous solutions, Atmos. Chem.  
468 Phys., 14, 4503-4514, doi:10.5194/acp-14-4503-2014, 2014.

469 Shen, X., Lee, T., Guo, J., Wang, X., Li, P., Xu, P., Wang, Y., Ren, Y., Wang, W., Wang, T., Li, Y., Carn, S. A., and  
470 Collett, J. L.: Aqueous phase sulfate production in clouds in eastern China, Atmospheric Environment, 62,  
471 502-511, <https://doi.org/10.1016/j.atmosenv.2012.07.079>, 2012.

472 Singh, R., Mailloux, R.J., Puisseux-Dao, S., Appanna, V.D.: Oxidative stress evokes a metabolic adaptation that  
473 favors increased NADPH synthesis and decreased NADH production in *Pseudomonas fluorescens*, J.  
474 Bacteriol., 189, 6665-6675, doi:10.1128/JB.00555-07, 2007.

475 Sporn, P.H. and Peters-Golden, M.: Hydrogen peroxide inhibits alveolar macrophages 5-lipoxygenase  
476 metabolism in association with depletion of ATP, J. Biol. Chem., 263, 14776-14783, 1988.

477 Spragg, R.G., Hinshaw, D.B., Hyslop, P.A., Schraufstatter, I.U., Cochrane, C.G.: Alterations in adenosine  
478 triphosphate and energy charge in cultured endothelial and P388D1 cells after oxidant injury, J. Clin. Invest.,  
479 76, 1471-1476, doi:10.1172/JCI112126, 1985.

480 Tamarit, J., Cabiscol, E., Ros, J.: Identification of the major oxidatively damaged proteins in *Escherichia coli*  
481 cells exposed to oxidative stress, *J. Biol. Chem.*, 273, 3027-3032, doi:10.1074/jbc.273.5.3027, 1998.

482 Thomas, S.C., Alhasawi, A., Auger, C., Omri, A., Appanna, V.D.: The role of formate in combatting oxidative  
483 stress, *J. Microbiol.*, 109, 263-271, doi:10.1007/s10482-015-0629-6, 10.1007/s10482-015-0629-6, 2016.

484 Thompson, A. M.: The oxidizing capacity of the Earth's atmosphere: probable past and future changes, *Science*,  
485 256(5060), 1157-1165, doi:10.1126/science.256.5060.1157, 1992.

486 Tiwari, B.S., Belenghi, B., Levine, A.: Oxidative stress increased respiration and generation of reactive oxygen  
487 species, resulting in ATP depletion, opening of mitochondrial permeability transition, and programmed cell  
488 death, *Plant Physiol.*, 128, 1271-1281, doi:10.1104/pp.010999, 2002.

489 Vaïtilingom, M., Amato, P., Sancelme, M., Laj, P., Leriche, M., Delort, A. M.: Contribution of microbial activity  
490 to carbon chemistry in clouds. *Appl. Environ. Microb.*, 76, 23-29, doi:10.1128/AEM.01127-09, 2010.

491 Vaïtilingom, M., Charbouillot, T., Deguillaume, L., Maisonobe, R., Parazols, M., Amato, P.; Sancelme, M.,  
492 Delort, A.-M.: Atmospheric chemistry of carboxylic acids: microbial implication versus photochemistry,  
493 *Atmos. Chem. Phys.*, 11, 8721-8733, doi:10.5194/acp-11-8721-2011, 2011.

494 Vaïtilingom, M., Attard, E., Gaiani, N., Sancelme, M., Deguillaume, L., Flossmann, A. I., Amato, P., Delort, A.  
495 M.: Long-term features of cloud microbiology at the puy de Dôme (France), *Atmos. Environ.*, 56, 88-100,  
496 doi :10.1016/j.atmosenv.2012.03.072, 2012.

497 Vaïtilingom, M., Deguillaume, L., Vinatier, V., Sancelme, M., Amato, P., Chaumerliac, N., Delort, A.-M.:  
498 Potential impact of microbial activity on the oxidant capacity and organic carbon budget in clouds, *P. Natl.*  
499 *Acad. Sci USA*, 110, 559-564, doi:10.1073/pnas.1205743110, 2013.

500 Vione, D, Maurino, V,; Minero, C., Pelizzetti, E.: The atmospheric chemistry of hydrogen peroxide: a review,  
501 *Ann. Chim-Rome*, 93, 477-488, 2003.

502 Wei, M., Xu, C., Chen, J., Zhu, C., Li, J., and Lv, G.: Characteristics of bacterial community in cloud water at  
503 Mt Tai: similarity and disparity under polluted and non-polluted cloud episodes, *Atmos. Chem. Phys.*, 17,  
504 5253-5270, <https://doi.org/10.5194/acp-17-5253-2017>, 2017.

505 Zar, J.H.: Significance testing of the Spearman rank correlation coefficient, *J. Am. Stat. Assoc.*, 67, 578-580,  
506 doi:10.2307/2284441, 1972.

507

508



509 **Table 1: Initial rates of abiotic degradation (a) and of biotic degradation (b) of H<sub>2</sub>O<sub>2</sub> measured in artificial cloud**  
 510 **water. Values are expressed in 10<sup>-9</sup> mol L<sup>-1</sup> s<sup>-1</sup>. Standard errors were calculated.**

| (a) | Light + Fe-EDDS] | Fe-[EDDS] | Light |
|-----|------------------|-----------|-------|
|     | 1.07             | 0.22      | 0.14  |

511

| (b)                                  | Light + Fe-[EDDS] +<br>Bacteria | Fe-[EDDS] +<br>Bacteria | Light + Bacteria | Bacteria    |
|--------------------------------------|---------------------------------|-------------------------|------------------|-------------|
| <i>Pseudomonas graminis</i><br>13b-3 | 1.55 ± 0.25                     | 1.93 ± 0.18             | 2.15 ± 0.02      | 2.07 ± 0.01 |
| <i>Pseudomonas syringae</i><br>13b-2 | 1.75 ± 0.15                     | 1.27 ± 0.04             | 1.72 ± 0.14      | 1.18 ± 0.08 |
| <i>Sphingomonas sp.</i><br>14b-5     | 1.97 ± 0.06                     | 1.01 ± 0.21             | 0.87 ± 0.04      | 0.76 ± 0.11 |

512

513

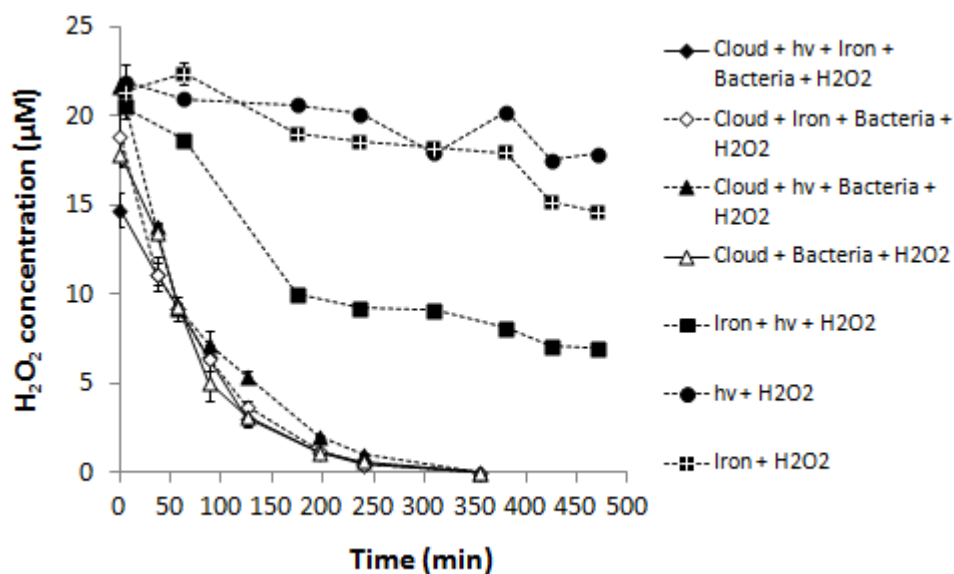

514

515 **Figure 1: Evolution of H<sub>2</sub>O<sub>2</sub> concentration as a function of time (min) under abiotic conditions: Light + Fe-[EDDS]**  
 516 **(black square), Light (black circle), Fe-[EDDS] (black square with white cross) and biotic conditions: Light + Fe-**  
 517 **[EDDS] + *Pseudomonas graminis* (13b-3) (black diamond), Fe-[EDDS] + *Pseudomonas graminis* (13b-3) (white**  
 518 **diamond), Light + *Pseudomonas graminis* (13b-3) (black triangle), *Pseudomonas graminis* (13b-3) (white triangle).**  
 519 **Values shown are averages of triplicates plus/minus one standard deviation. Symbols are averages of triplicates and**  
 520 **error bars represent the standard error. Where error bars do not appear they are smaller than the symbol.**

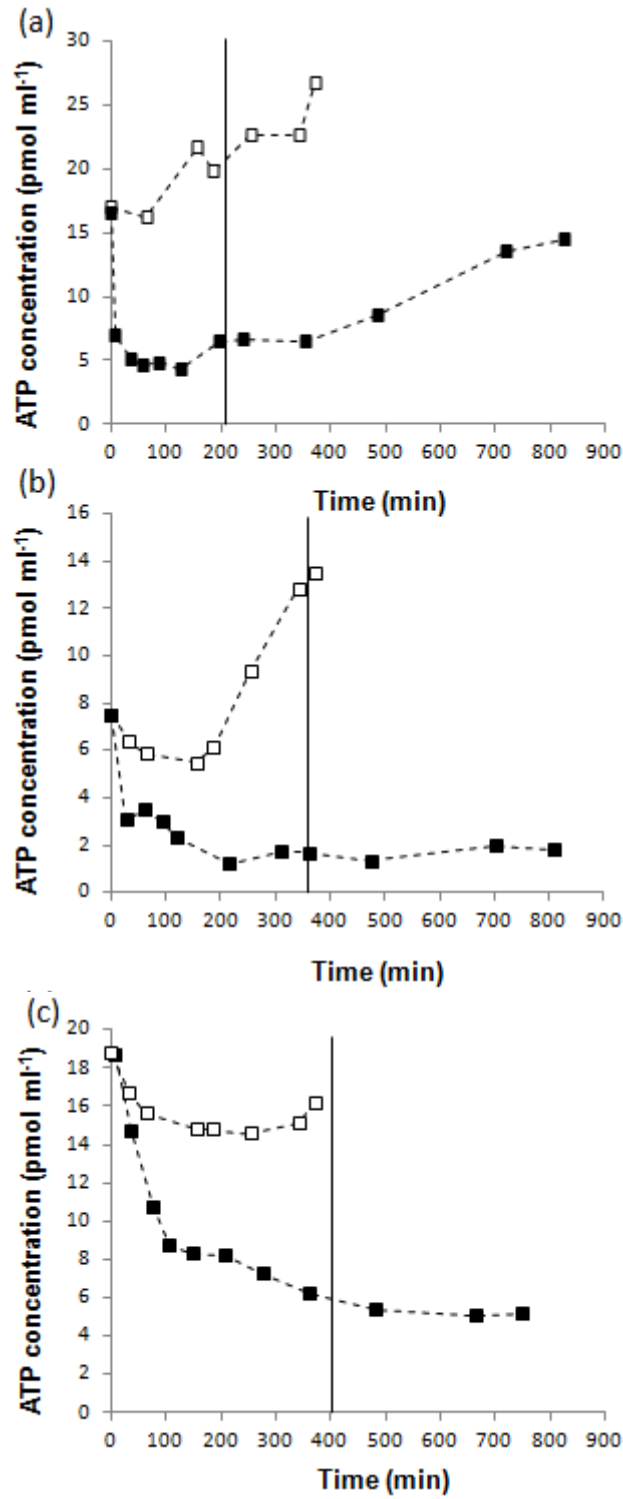

521

522

523 **Figure 2:** ATP concentration ( $\mu\text{M}$ ) as a function of time (min) in the presence (black square) or the absence (white  
 524 square) of  $\text{H}_2\text{O}_2$  for the three strains: (a) *Pseudomonas graminis* (13b-3), (b) *Pseudomonas syringae* (13b-2), (c)  
 525 *Sphingomonas sp.* (14b-5).

526 The vertical bar illustrates the time corresponding to the total degradation of  $\text{H}_2\text{O}_2$ .

527

528

529

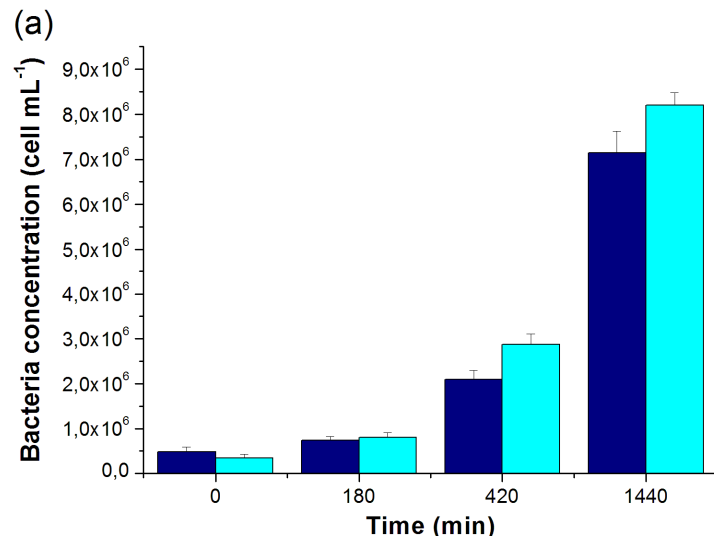

530

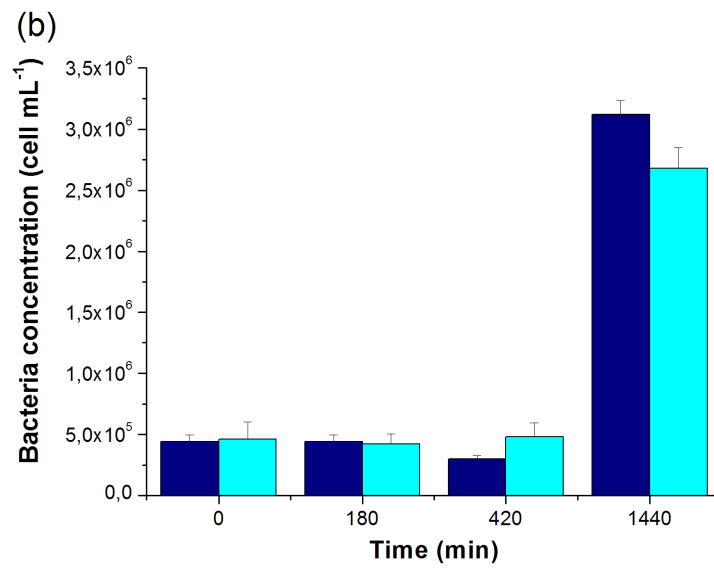

531

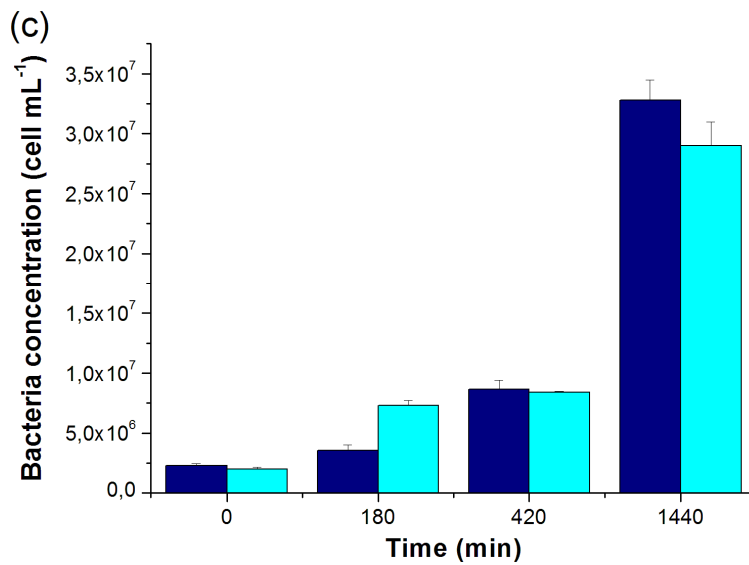

532

533 **Figure 3: Bacterial cell numbers measured by plate-counting in the absence (light blue) and the presence (dark blue)**  
 534 **of H<sub>2</sub>O<sub>2</sub> at 20 μM for the three strains: (a) *Pseudomonas graminis* (13b-3), (b) *Pseudomonas syringae* (13b-2) and (c)**  
 535 ***Sphingomonas sp.* (14b5). Error bars represent standard deviation from the means (n=3).**

536

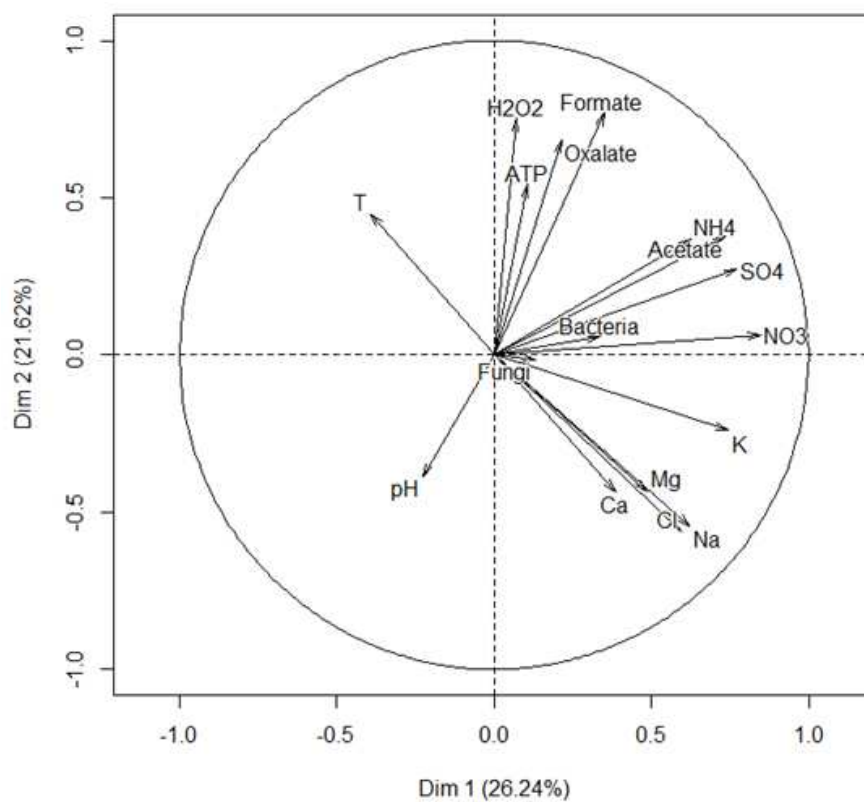

537

538 **Figure 4: Variables factor map (PCA) of the 37 cloud events on the plane PC1-PC2 based on 17 variables.**

539

540

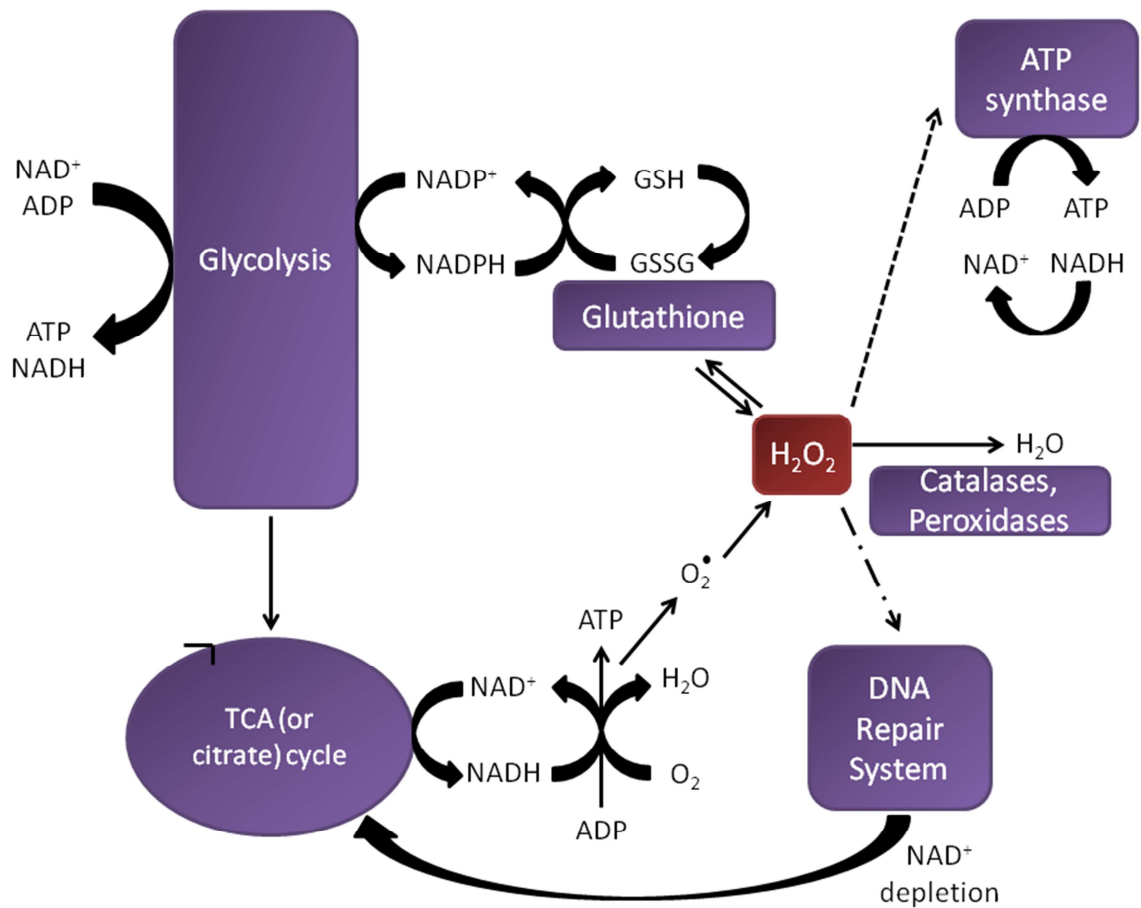

541  
 542 **Figure 5: Hypothetical mechanism that could explain the impact of  $\text{H}_2\text{O}_2$  on cell metabolism and ATP concentration.**  
 543 **Interconnection between ATP synthesis and cellular redox potential ( $\text{NAD}^+/\text{NADH}$ ,  $\text{NADP}^+/\text{NADPH}$  ratios).  $\text{NAD}^+$**   
 544 **depletion related to DNA repair system. Adapted from Oka et al. (2012).**  
 545 -----> **Inhibition of ATP synthase**  
 546 -.-.-.->  **$\text{NAD}^+$  depletion related to DNA repair system**



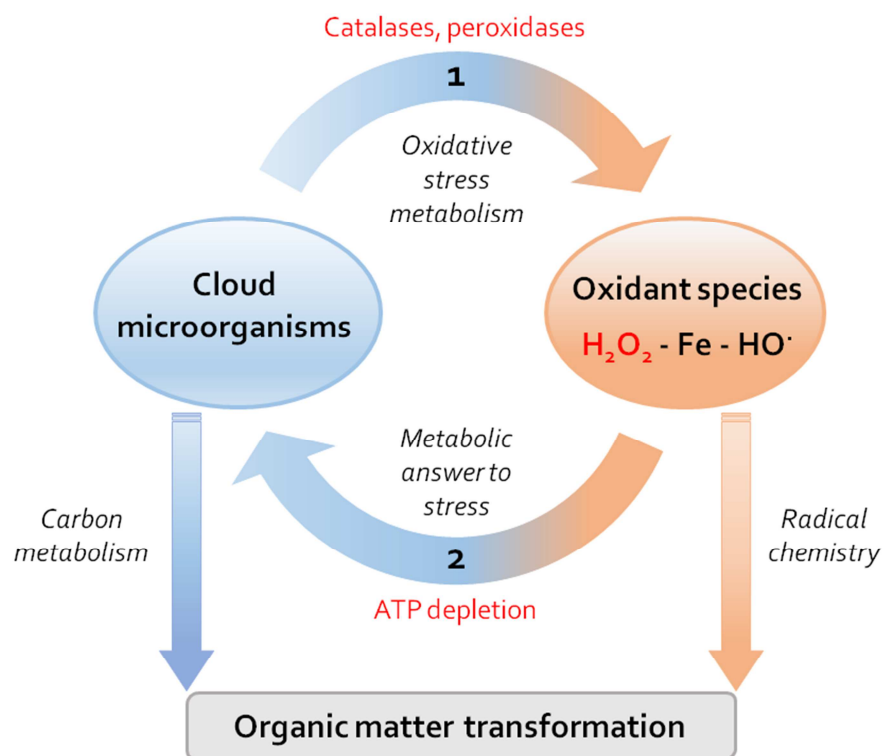

547

548 **Figure 6: Interaction between H<sub>2</sub>O<sub>2</sub> and cloud microorganisms and its potential consequences on atmospheric**  
 549 **chemistry. (1) Cloud microorganisms degrade H<sub>2</sub>O<sub>2</sub> thanks to their catalases and peroxidases (oxidative stress**  
 550 **metabolism) as a result it impacts the oxidant capacity of clouds. The concentration of radicals issued from H<sub>2</sub>O<sub>2</sub> is**  
 551 **decreased and radical chemistry is less efficient to transform the organic matter. (2) H<sub>2</sub>O<sub>2</sub> impacts the energetic**  
 552 **metabolism of microorganisms that react to this stress. The depletion of ATP modulates the global carbon metabolism**  
 553 **of the microorganisms, and consequently the transformation of the organic matter. These processes are modulated by**  
 554 **the H<sub>2</sub>O<sub>2</sub> concentration that varies depending on atmospheric scenari.**

555
